# Supplementary material for: Structural Characterization of Lignin in Four Cacti Wood: Implications of Lignification in the Growth Form and Succulence
Source: Front Plant Sci. 2018 Oct 17;9:1518. doi: 10.3389/fpls.2018.01518 (PMC6199501; doi:10.3389/fpls.2018.01518)
Supplement: Supplementary file 4 [file Table_1.XLS]

## Sheet: Table S1
Table S1. Identities and molar abundances of main compounds released by Py-GC/MS of the E-FW.
Peak	RT (min) a	CAS	Compound	MW	Origin	P. lychnidiflora	O. streptacantha	F. hamatacanthus	P. chrysacanthus
1	2.85	78-98-8	2-oxo-propanal	72.0627	Carb.	8.45456	9.30309	13.3074	8.99231
2	3.23	141-46-8	hydroxyacetaldehyde	60.052	Carb.	6.13257	19.8917	17.6608	22.8281
3	3.97	116-09-6	hydroxypropanone	74.0785	Carb.	1.5165	5.60073	4.67337	4.72556
4	5.57	542-59-6	ethanediol monoacetate	104.105	Carb.	5.16718	4.82515	6.70958	4.60356
5	5.77	638-37-9	butanedial	86.09	Carb.	3.37777	1.74332	1.424	2.05226
6	5.94	600-22-6	methyl pyruvate	102.089	Carb.	2.69987	4.82287	3.59308	4.51104
7	6.94	98-01-1	furfural	96.0841	Carb.	4.54273	4.62854	3.49592	2.84709
8	9.16	6672-30-6	3-methyl-cyclopentanone	98.143	Carb.	1.65399	1.42784	2.71273	2.65329
9	11.03	2892-51-5	3,4-dihydroxy-3-cyclobutene-1,2-dione	114.056	Carb.	4.39852	3.78475	4.70146	4.33679
10	11.9	765-70-8	3-methyl-1,2-cyclopentanedione	112.126	Carb.	1.44543	0.993223	0.852105	0.75768
11	13.49	90-05-1	guaiacol	124.137	G	1.58128	0.603405	1.21608	1.73775
12	16.1	93-51-6	4-methylguaiacol	138.164	G	1.51298	0.694451	0.212093	2.03573
13	16.19-16.30	120-80-9	catechol	110.111	G	1.9861	0.542413	0.020924	0.861324
14	17	67-47-0	5-(hydroxymethyl)furfural	126.11	Carb.	1.78228	1.87684	0.0248747	1.7492
15	17.8	934-00-9	3-methoxycatechol	140.137	G	2.20701	3.94539	1.70465	1.2472
16	18.2	2785-89-9	4-ethylguaiacol	152.19	G	1.28643	0.623968	0.132641	0.506086
17	18.4	608-25-3	2-methyl-1,3-benzenediol	124.137	UD	0.727773	0	0.0282401	0.614561
18	18.95	7786-61-0	4-vinylguaiacol	150.174	G/FA	3.89139	1.33903	4.40085	3.12234
19	19.77	91-10-1	syringol	154.163	S	5.09947	3.08132	2.06101	1.808
20	19.96	1941-12-4	3-allylguaiacol	164.201	G	0.9045	0.540227	0.423455	0.924168
21	20.06	2033-89-8	3,4-dimethoxyphenol	154.163	C-Cc b	1.0199	0.851792	0.238358	0.481535
22	20.85	121-33-5	vanillin	152.147	G	1.5232	0.523246	0.490836	1.61593
23	21.06	97-54-1	isoeugenol	164.201	G	0.492226	0.243688	0.0198266	0.466397
24	21.88	6638-05-7	4-methylsyringol	168.19	S	3.65223	2.70783	1.13926	2.6753
25	21.96	5912-86-7	cis-isoeugenol	164.201	G	2.5932	2.18798	0.481106	3.45481
26	22.7	498-02-2	acetovanillone	166.174	G	0.499572	0.474769	0	1.4761
27	22.72 - 23.55	498-07-7	levoglucosan	162.141	Carb.	5.36834	5.01398	7.3452	4.10667
28	24.31	39151-19-4	3',5'-dimethoxyacetophenone	180.2	S	5.36908	3.40694	4.01075	2.9809
29	25.05	28343-22-8	4-vinylsyringol	180.203	S	1.50399	1.63371	0.991183	0.619214
30	26	6627-88-9	methoxyeugenol	194.227	S	1.75502	1.73955	0.742875	1.19162
31	26.10-26.20	134-96-3	syringaldehyde	182.173	S	1.86367	1.82408	1.78673	0.819451
32	26.92	20675-95-0	trans-4-propenylsyringol	194.227	S	2.60656	2.80362	2.99155	1.34644
33	27.5	28294-47-5	4-acetyl-2,6-dimethoxyphenyl acetate	238.242	S	0	0	1.22464	0
34	27.54	2478-38-8	acetosyringone	196.2	S	4.27103	1.98705	0	0
35	27.6	32811-40-8	trans-coniferyl alcohol	180.201	G	0	0	0	2.21234
36	28.2	4385-56-2	homosyringic acid	212.199	S	0.622163	0.480258	0.645059	0.266983
37	29.15	0-00-0	3,5-dimethoxy-4-(ethyl)oxybenzaldehyde	210	S	0.278877	0.303098	0.0137542	0.146841
38	30.32	63543-12-4	5-(3-hydroxypropyl)-2,3-dimethoxyphenol	212.242	UD	0.379004	0.517105	0.0239968	0
39	30.6-31.4	537-33-7	cis-sinapyl alcohol	210.226	S c	2.55248	0.836626	0.85108	0.627195
40	31.79	4206-58-0	trans-sinapaldehyde	208.211	S	0.372723	1.6177	0.145005	0.313615
41	31.9	20675-96-1	trans-sinapyl alcohol	210.226	S	2.90843	0.578701	7.50345	2.28464
					% G	35.9957	33.7526	16.3205	56.5917
					% S	64.0043	66.2474	83.6795	43.4083
					S/Gd	1.77811	1.96274	5.12726	0.767043
a The number for each compound and its respective retention time correspond to the peaks indicated in Figure S1.
b Compounds formed by cleavage of the C-C linkages.
c The value within this range for each species corresponds to the percentage of the integrated area for the cis-sinapilic alcohol (min 30.63) and the sum of the areas of its structural isomers with identical mass spectra (spectra compared to those shown by Ralph and Hatfield, 1991).
d The sum of all derivatives of the S and G units was used to calculate the S/G ratio, except for F. hamatacanthus where 4-vinylguaiacol was not taken into account since it can be derived from the ferulates. Overlapped peaks and compounds with undefined origin were omitted.
Abbreviations: Carb., Carbohydrates; FA, ferulates; G, Guaiacyl units; MW, molecular weight; RT, Retention time; S, Syringyl units; UD, undefined.
